# Supplementary material for: Utredares okunnighet och tankefel om normal barnsexualitet i barnavårdsutredningar (BBIC) och i en utredning av vårdnad, boende och umgänge. Ännu ett fall inom knäsittningens praktik.
Source: MDPI journal article supplement (doi:10.3390/molecules27154731), 2011-01-01
Supplement: s1 [file s1]

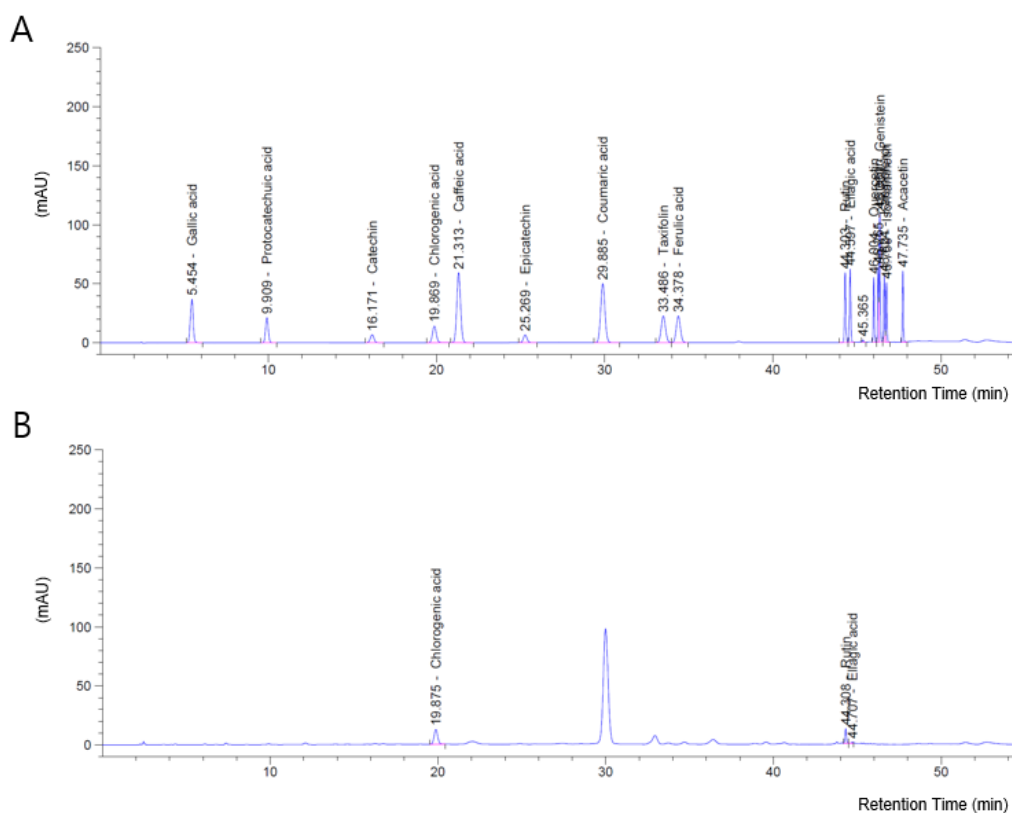

Fig. S1. High-performance liquid chromatography (HPLC) of (A) phenolic compounds standards and (B) HB extract.

Table S1. The identified phenolic compounds except anthocyanin in HB extracts by High Performance Liquid Chromatography

| Retention Time (min) | Compound         | Molecular weight | Structural formula |
|----------------------|------------------|------------------|--------------------|
| 19.875               | Chlorogenic acid | 354.3            |                    |
| 44.308               | Rutin            | 610.5            |                    |
| 44.707               | Ellagic acid     | 302.2            |                    |

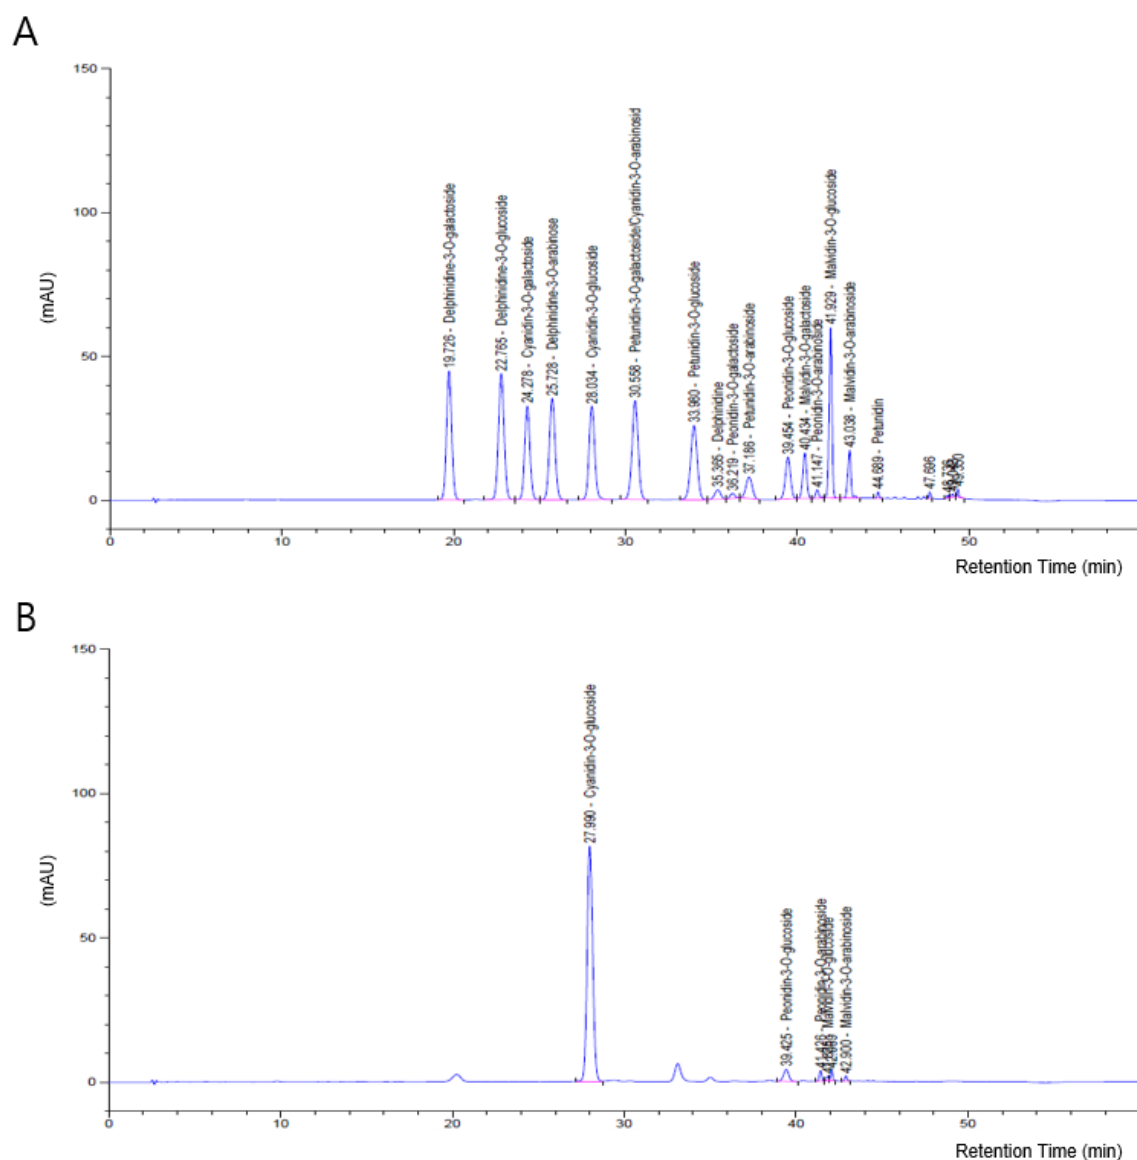

Fig. S2. High-performance liquid chromatography (HPLC) of (A) anthocyanin standard and (B) HB extract.

Table S2. The identified anthocyanin in HB extracts by High Performance Liquid Chromatography

| Retention Time (min) | Compound               | Molecular weight | Structural formula |
|----------------------|------------------------|------------------|--------------------|
| 27.990               | Cyanidin-3-O-glucoside | 484.8            |                    |

|        |                          |       |                                                                                      |
|--------|--------------------------|-------|--------------------------------------------------------------------------------------|
| 39.425 | Peonidin-3-O-glucoside   | 463.4 | 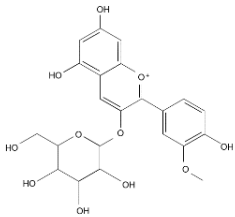  |
| 41.426 | Peonidin-3-O-arabinoside | 433.4 |   |
| 41.825 | Malvidin-3-O-glucoside   | 528.9 |   |
| 42.900 | Malvidin-3-O-arabinoside | 498.9 |  |

#### *Analyses of Phenolic compounds in HB extract*

Phenolic compounds of the HB extract were analyzed using the High-Performance Liquid Chromatography (HPLC) system (1260 Infinity II, Agilent, Santa Clara, CA, USA).

For the phenolic compounds except anthocyanin, Agilent Eclipse XDB C18 (5µm, 4.6 I.D. × 250mm) column was used. Mobile phases A (water with 0.5% Phosphoric acid) and B (Methanol) were conducted with gradients (0–40 min, 92:8; 40–45 min, 66:34; 45–48 min, 2:98; 48–50 min, 2:98; 50–55 min, 92:8, v/v). The solvent flow rate was set at 1.0 mL/min. The HPLC-UV system was operated at a gain of 1 and drift column oven temperature of 40 °C. The runs were monitored for phenolic components without anthocyanin at 280 nm. The 0.3g of samples were dissolved in 80% methanol followed by membrane (0.45 µm). Solvents for HPLC experiments were purchased from Burdick & Jackson (Morristown, NJ, USA). Standard materials were commercially purchased (Gallic acid, Catechin, Chlorogenic acid, Caffeic acid, Epicatechin, Coumaric acid, Taxifolin, trans-Ferulic acid, Rutin, Ellagic acid, Quercetin, Kaempferol, Isorhamnetin, and Acacetin were purchased from Sigma–Aldrich, St. Louis, MO, USA; Protocatechuic acid was purchased from HWI; Luteolin was purchased from PhytoLab, Genistein was purchased from Wako).

For the anthocyanin, Shiseido UG 120 C18 (5µm, 4.6 I.D. × 250mm) column was used, and analyzed according to the USP 37 NF32 (Powdered Bilberry Extract, Content of

Anthocyanosides and Anthocyanidins). Briefly, mobile phases A (water with 10% Formic acid) and B (Methanol : Formic acid : D.W. = 45 : 45 : 20 : 80) were conducted with gradients (0–35 min, 93:7; 35–45 min, 75:25; 45–46 min, 35:65; 46–50 min, 0:100; 50–51 min, 0:100; 51–60 min, 93:7, v/v). The solvent flow rate was set at 1.0 mL/min. The HPLC-UV system was operated at a gain of 1 and drift column oven temperature of 30 °C. The runs were monitored for anthocyanin at 535 nm. Standard materials (Powdered Bilberry extract, USP Certificate) was purchased from Sigma–Aldrich (St. Louis, MO, USA)
